# Supplementary material
Source: PubMed Central journal article supplement (PMC4500170)
Supplement: NIHMS146274-supplement-1_si_001.pdf [file NIHMS146274-supplement-1_si_001.pdf]

## Supporting Information

# Molecular basis of substrate promiscuity for the SAM-dependent *O*-methyltransferase, NcsB1, involved in the biosynthesis of the enediyne antitumor antibiotic neocarzinostatin

*Heather A. Cooke,<sup>1</sup> Elizabeth L. Guenther,<sup>1</sup> Yinggang Luo,<sup>2</sup> Ben Shen,<sup>2,3</sup> and Steven D. Bruner<sup>1\*</sup>*

<sup>1</sup>Department of Chemistry, Boston College, Eugene F. Merkert Chemistry Center, Chestnut Hill, Massachusetts, 02467; <sup>2</sup>Division of Pharmaceutical Sciences and <sup>3</sup>Department of Chemistry, University of Wisconsin-Madison, Madison, Wisconsin 53705, U. S. A.

\* To whom correspondence should be addressed. Tel. 617-552-2931, Fax: 617-552-2705, E-mail: bruner@bc.edu

Table S1: Crystallization Conditions for NcsB1

|                    | SAH               | SAM and 2       | SAH and 4       | SAH and 6       |
|--------------------|-------------------|-----------------|-----------------|-----------------|
| NcsB1 (mg/mL)      | 2                 | 2               | 2               | 2               |
| cofactor (mM)      | 2                 | 2               | 2               | 2               |
| NA (mM)            | 0                 | 2               | 2               | 1               |
| $\beta$ ME (mM)    | 1                 | 1               | 1               | 10              |
| Sodium Formate (M) | 3.7               | 3.6             | 3.66            | 3.9             |
| Space Group        | C222 <sub>1</sub> | P6 <sub>5</sub> | P6 <sub>5</sub> | P6 <sub>5</sub> |
| Resolution (Å)     | 2.1               | 2.6             | 2.7             | 3.0             |

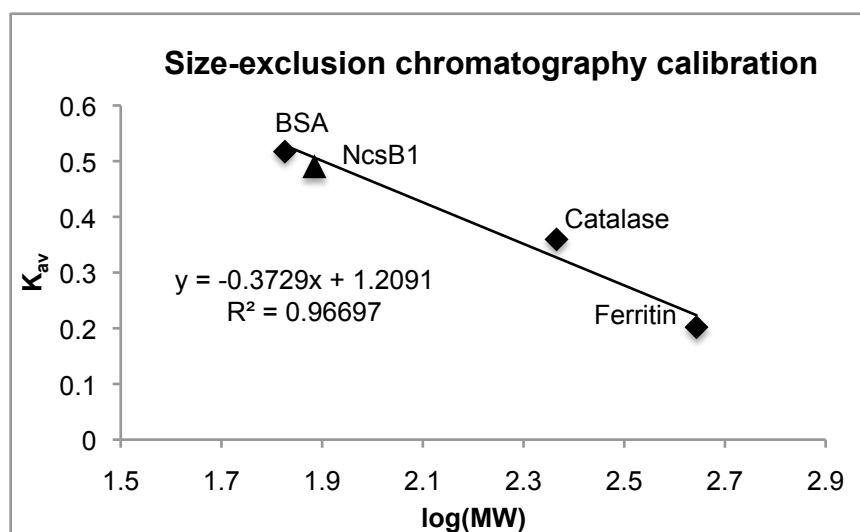

Figure S1: Size-exclusion chromatography calibration for estimating biologically active unit of NcsB1 (▲).  $K_{av}$  for NcsB1 = 0.491; Calculated size = 84.3 kDa, ~2 monomers. Actual size = 69.0 kDa.

Table S2: Dali Structural Homolog Search (1)

| Position <sup>a</sup> | PDB <sup>b</sup> | Z <sup>c</sup> | RMSD <sub>Ca</sub> (Å) | # of eq. res. | # of res. | %ID of eq. res. | Description                            |
|-----------------------|------------------|----------------|------------------------|---------------|-----------|-----------------|----------------------------------------|
| 1 (2)                 | 1TW3             | 39.2           | 1.8                    | 324           | 340       | 44              | DnrK, <i>Streptomyces peucetius</i>    |
| 5 (3)                 | 1XDS             | 37.5           | 1.7                    | 316           | 336       | 45              | RdmB, <i>Streptomyces purpurascens</i> |
| 10 (4)                | 1FPX             | 29.6           | 3.8                    | 309           | 345       | 23              | IOMT, alfalfa                          |
| 12                    | 2R3S             | 29.1           | 3.6                    | 314           | 330       | 18              | NPOMT, <i>Nostoc punctiforme</i>       |
| 13 (5)                | 2IP2             | 28.7           | 4.8                    | 317           | 330       | 26              | PhzM, <i>Pseudomonas aeruginosa</i>    |
| 16 (6)                | 1KYW             | 27.0           | 4.3                    | 313           | 361       | 25              | COMT, alfalfa                          |

<sup>a</sup> Position in listing of structural homologs. Gaps indicate additional structure(s) of identical proteins. Reference in parentheses.

<sup>b</sup> Protein Data Bank code

<sup>c</sup> Strength of structural similarity

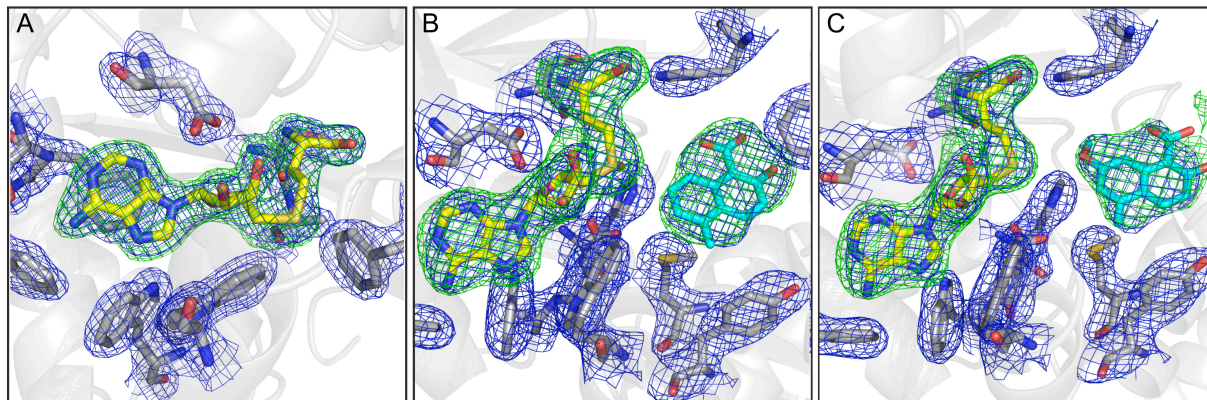

Figure S2:  $2F_o - F_c$  maps contoured to  $1.5 \sigma$  and  $F_o - F_c$  map contoured to  $3.0$ . Maps generated without ligands modeled into active site (A) NcsB1/SAH. (B) NcsB1/SAM/2. (C) NcsB1/SAH/4.





3-hydroxybenzoic acid (**S3**) to 3-methoxybenzoic acid (**S5**) LC-MS (negative mode) yielded  $m/z$  137.1 and 151.1, respectively ( $[M-H]^-$  for both)

To determine the kinetic parameters of NcsB1 with **S2** and **S3** and mutant constructs with **S2**, 50  $\mu$ L reaction mixtures containing 2.5 mM SAM, 100 mM phosphate buffer at pH 6.5 and varying concentrations of benzoic acid ranging from 50  $\mu$ M to 2.0 mM were set up. Reactions were initiated by the addition of 100 mM enzyme, and run at 25 °C. Reactions were quenched with trifluoroacetic to a final concentration of 16% at a specified time to determine the initial rate. Reaction times were as follows: **S2** with WT, Arg11Ala, and Arg11Lys for 90 min, **S2** with Tyr293Ile and **S3** with WT for 120 min, **S2** with Ala11Trp for 60 min. Reactions were analyzed by UV detection as described above. To obtain kinetic parameters, initial rates were plotted against substrate concentration and were fitted to the Michaelis-Menten equation using KaleidaGraph (Synergy Software, Reading, PA).

| Protein/substrate    | $K_m$ ( $\mu$ M) | $k_{cat}$ ( $\text{min}^{-1}$ ) | $k_{cat}/K_m$ (rel to WT/NA) | $k_{cat}/K_m$ (rel to WT/BA) |
|----------------------|------------------|---------------------------------|------------------------------|------------------------------|
| WT/ <b>S2</b>        | 280 $\pm$ 30     | 0.0043 $\pm$ 0.0001             | 0.005                        | 1                            |
| WT/ <b>S3</b>        | 137 $\pm$ 22     | 0.00064 $\pm$ 0.00002           | 0.001                        | 0.3                          |
| Tyr293Ile/ <b>S2</b> | 558 $\pm$ 113    | 0.0033 $\pm$ 0.0003             | 0.002                        | 0.4                          |
| Arg11Trp/ <b>S2</b>  | 183 $\pm$ 27     | 0.0071 $\pm$ 0.0003             | 0.012                        | 2.6                          |
| Arg11Ala/ <b>S2</b>  | 216 $\pm$ 17     | 0.0022 $\pm$ 0.0005             | 0.003                        | 0.7                          |
| Arg11Lys/ <b>S2</b>  | 348 $\pm$ 41     | 0.0040 $\pm$ 0.0002             | 0.003                        | 0.7                          |

## REFERENCES

1. Holm, L., Kaariainen, S., Rosenstrom, P., and Schenkel, A. (2008) Searching protein structure databases with DaliLite v.3, *Bioinformatics* 24, 2780-2781.
2. Jansson, A., Koskiniemi, H., Mantsala, P., Niemi, J., and Schneider, G. (2004) Crystal structure of a ternary complex of DnrK, a methyltransferase in daunorubicin biosynthesis, with bound products, *J. Biol. Chem.* 279, 41149-41156.
3. Jansson, A., Koskiniemi, H., Erola, A., Wang, J., Mantsala, P., Schneider, G., and Niemi, J. (2005) Aclacinomycin 10-hydroxylase is a novel substrate-assisted hydroxylase requiring S-adenosyl-L-methionine as cofactor, *J. Biol. Chem.* 280, 3636-3644.
4. Zubieta, C., He, X. Z., Dixon, R. A., and Noel, J. P. (2001) Structures of two natural product methyltransferases reveal the basis for substrate specificity in plant O-methyltransferases, *Nat. Struct. Biol.* 8, 271-279.
5. Parsons, J. F., Greenhagen, B. T., Shi, K., Calabrese, K., Robinson, H., and Ladner, J. E. (2007) Structural and functional analysis of the pyocyanin biosynthetic protein PhzM from *Pseudomonas aeruginosa*, *Biochemistry* 46, 1821-1828.
6. Zubieta, C., Kota, P., Ferrer, J. L., Dixon, R. A., and Noel, J. P. (2002) Structural basis for the modulation of lignin monomer methylation by caffeic acid/5-hydroxyferulic acid 3/5-O-methyltransferase, *Plant Cell* 14, 1265-1277.
7. Luo, Y., Lin, S., Zhang, J., Cooke, H. A., Bruner, S. D., and Shen, B. (2008) Regiospecific O-methylation of naphthoic acids catalyzed by NcsB1, an O-methyltransferase involved in the biosynthesis of the enediyne antitumor antibiotic neocarzinostatin, *J. Biol. Chem.* 283, 14694-14702.
